# Supplementary material for: Assessment of the Potential of Electric Propulsion for General Aviation Using Model-Based System Engineering (MBSE) Methodology
Source: MDPI journal article supplement (doi:10.3390/aerospace9020074), 2022-01-28
Supplement: s1 [file s1]

Conditions

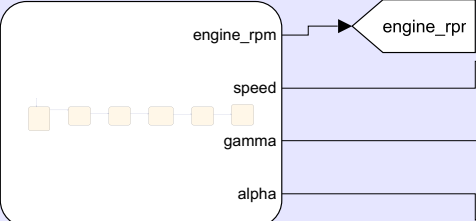

Flight Control Module (FCM)

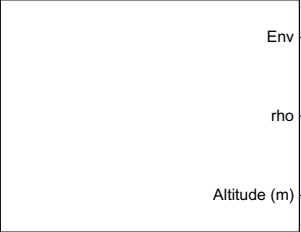

Environment

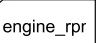

engine\_rpr

Airframe

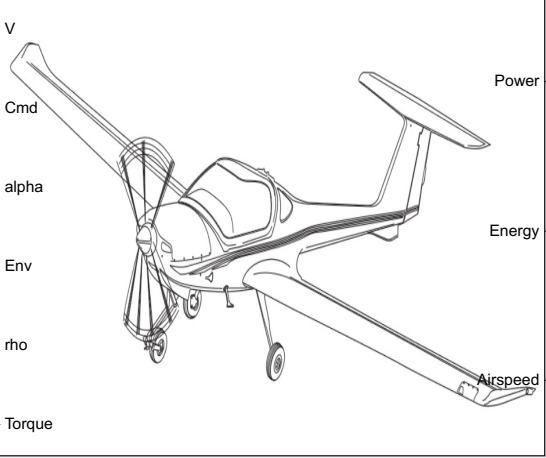

Aircraft

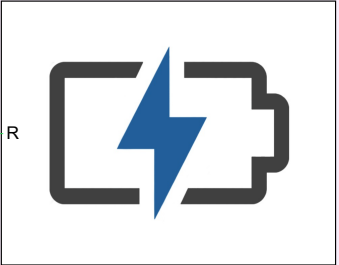

Power Subsystem

R

Power (kW)

Energy (kWh)

Airspeed (km/h)

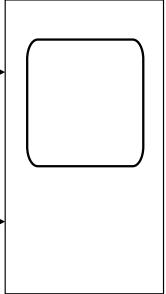

Power, Energy

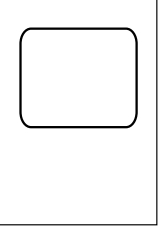

Airspeed, Altitude
